# Supplementary material for: An Efficient Five-lncRNA Signature for Lung Adenocarcinoma Prognosis and Its Overall Survival Prediction
Source: Research Square preprint supplement (doi:10.21203/rs.3.rs-1348662/v1), 2022-03-11
Supplement: Supplementary file 1 [file 8b39f27f498dd8730477044d.docx]

**Supplementary Table 1. Univariate Cox proportional hazards regression analysis of 15 candidate OS-related lncRNA in the entire dataset.**

| Id | HR | Lower CI | Higher CI | P value |
| --- | --- | --- | --- | --- |
| LINC02081 | 1.1187 | 1.0329 | 1.2117 | 0.0058 |
| AC010343.3 | 1.4322 | 1.1804 | 1.7377 | 0.0002 |
| LINC02086 | 1.2027 | 1.0824 | 1.3364 | 0.0006 |
| AC068228.1 | 1.5809 | 1.2563 | 1.9894 | <0.0001 |
| AC022784.1 | 1.0236 | 1.007 | 1.0403 | 0.0044 |
| SATB2-AS1 | 9.5654 | 2.5295 | 36.1719 | 0.0008 |
| AL138789.1 | 1.1395 | 1.0476 | 1.2395 | 0.0023 |
| LINC01843 | 1.1057 | 1.0466 | 1.1682 | 0.0003 |
| LINC00519 | 1.1638 | 1.0610 | 1.2766 | 0.0013 |
| AC026355.1 | 0.7433 | 0.6293 | 0.8778 | 0.0004 |
| AL606489.1 | 1.1909 | 1.0864 | 1.3055 | 0.0002 |
| DEPDC1-AS1 | 84.9598 | 7.7797 | 927.8117 | 0.0003 |
| AC087588.2 | 1.3927 | 1.1478 | 1.6899 | 0.0008 |
| AL031600.2 | 0.0682 | 0.0113 | 0.4098 | 0.0033 |
| FAM83A-AS1 | 1.0348 | 1.0141 | 1.0558 | 0.0009 |

Abbreviations: HR, hazard ratio; CI, confidence interval.


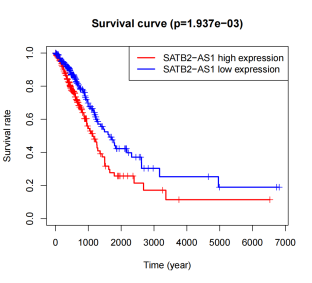

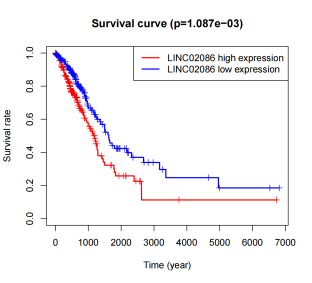

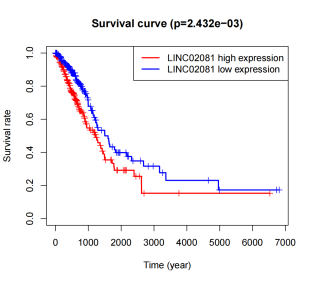

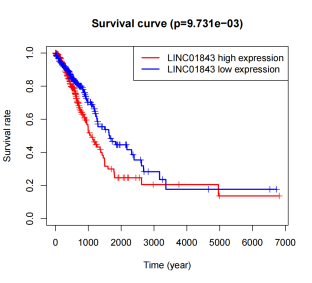

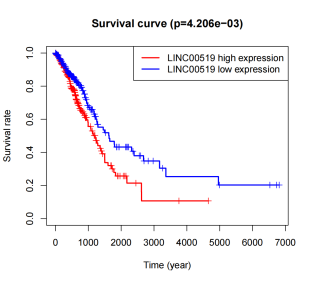

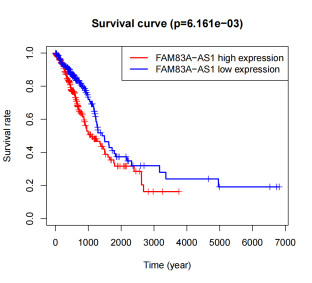

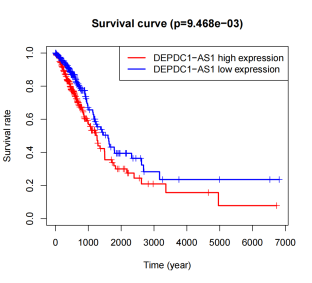

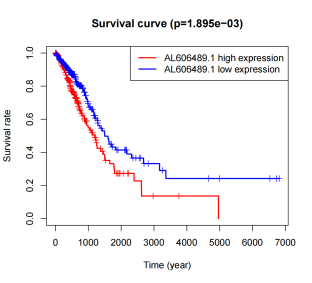

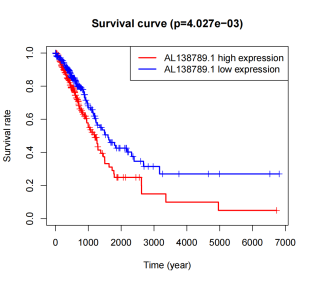

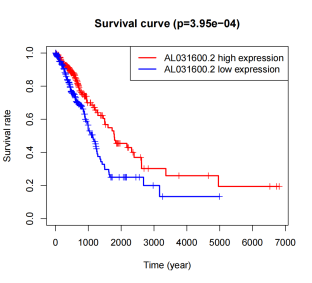

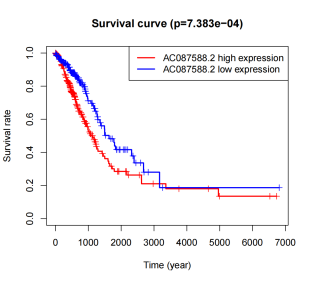

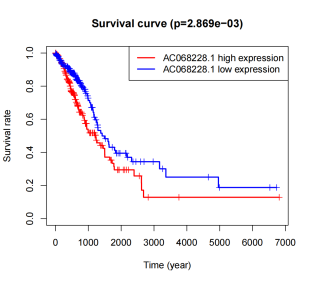

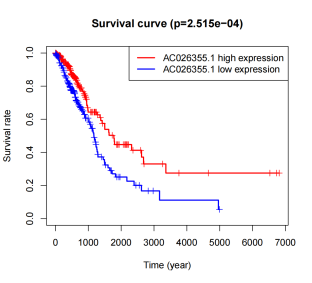

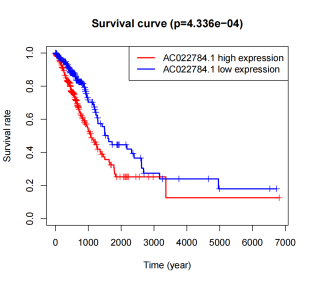

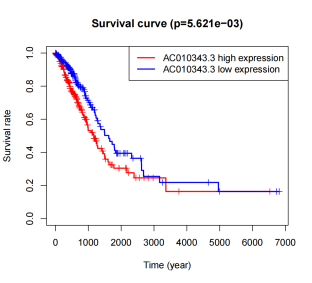


**Supplementary Figure . the Kaplan-Meier analysis curves of 15 candidate OS-related lncRNA in the entire datase**

**Supplementary Table 2. Univariate and multivariate Cox proportional hazards regression analysis of 5-lncRNA signature and clinical risk factors in the “primary dataset”.**

| **Characteristic** | **Univariate analysis** | | **Multivariate analysis** | |
| --- | --- | --- | --- | --- |
| **HR (95%CI)** | **P-Value** | **HR (95%CI)** | **P Value** |
| Age | 0.990(0.967-1.014) | 0.454 | 1.004(0.980-1.030) | 0.707 |
| Gender (female *vs.* male) | 0.867(0.556-1.352) | 0.530 | 0.847(0.537-1.335) | 0.475 |
| TNM stage (I-Ⅳ) | 1.853(1.468-2.340) | **<0.001** | 1.736(1.128-2.672) | **0.012** |
| Tumor stage (T1-T4) | 1.503(1.100-2.054) | **0.010** | 1.120(0.798-1.572) | 0.509 |
| Lymph node metastasis (N0-N3) | 1.703(1.312-2.211) | **<0.001** | 0.980(0.623-1.542) | 0.933 |
| Risk score | 1.090(1.056-1.125) | **<0.001** | 1.065(1.028-1.102) | **<0.001** |

Notes: Bold values indicate statistical significance (*P* < 0.05).

Abbreviations: HR, hazard ratio; CI, confidence interval.

**Supplementary Table 3. lncRNA-mRNA co-expression data.**

| **lncRNA** | **mRNA** | **correlation coefficient** | **P value** |
| --- | --- | --- | --- |
| AC026355.1 | AAK1 | 0.700980473 | 2.80E-80 |
| AL606489.1 | AAK1 | 0.511150619 | 6.00E-37 |
| AC026355.1 | ABCA1 | 0.576768451 | 9.20E-49 |
| AC026355.1 | ABCA5 | 0.577313766 | 7.15E-49 |
| AC026355.1 | ABCA6 | 0.656641988 | 2.64E-67 |
| AC026355.1 | ABCA9 | 0.634451208 | 1.33E-61 |
| AC026355.1 | ABCC9 | 0.526816232 | 1.55E-39 |
| AC026355.1 | ABHD13 | 0.50282653 | 1.26E-35 |
| AC026355.1 | ABHD18 | 0.529393682 | 5.63E-40 |
| AC026355.1 | ABL2 | 0.640430055 | 4.30E-63 |
| AC026355.1 | ABRAXAS1 | 0.509508477 | 1.10E-36 |
| AL606489.1 | ACOT11 | 0.533338661 | 1.18E-40 |
| AC026355.1 | ACTR3C | 0.689153658 | 1.37E-76 |
| AC026355.1 | ACVR2A | 0.529036598 | 6.48E-40 |
| AC026355.1 | AFF1 | 0.59905834 | 2.04E-53 |
| AL606489.1 | AFF1 | 0.507560849 | 2.25E-36 |
| AC026355.1 | AFF4 | 0.693874315 | 4.85E-78 |
| AC026355.1 | AGO2 | 0.507131855 | 2.64E-36 |
| AC026355.1 | AGO3 | 0.744858857 | 1.00E-95 |
| AC026355.1 | AHI1 | 0.694020853 | 4.36E-78 |
| AC026355.1 | AKAP11 | 0.620140175 | 3.63E-58 |
| AC026355.1 | AKAP9 | 0.634190566 | 1.54E-61 |
| AL606489.1 | AKAP9 | 0.500787678 | 2.62E-35 |
| AC026355.1 | ALG10 | 0.527715849 | 1.09E-39 |
| AC026355.1 | ALG10B | 0.604859176 | 1.09E-54 |
| AL606489.1 | ALG11 | 0.508029831 | 1.90E-36 |
| AC026355.1 | ALG13 | 0.720357413 | 9.82E-87 |
| AC026355.1 | ALMS1 | 0.631669958 | 6.39E-61 |
| AC026355.1 | ALPK1 | 0.512132841 | 4.17E-37 |
| AC026355.1 | ANAPC4 | 0.540341583 | 6.96E-42 |
| AC026355.1 | ANGEL2 | 0.616511305 | 2.53E-57 |
| AC026355.1 | ANGPTL1 | 0.66219958 | 8.25E-69 |
| AC026355.1 | ANKAR | 0.707473327 | 2.20E-82 |
| AL606489.1 | ANKAR | 0.528564922 | 7.79E-40 |
| AC026355.1 | ANKHD1 | 0.746434048 | 2.45E-96 |
| AC026355.1 | ANKRD12 | 0.604063946 | 1.64E-54 |
| AC026355.1 | ANKRD26 | 0.616227347 | 2.94E-57 |
| AC026355.1 | ANKRD28 | 0.541390133 | 4.53E-42 |
| AC026355.1 | ANKRD36 | 0.809342132 | 2.80E-125 |
| AL606489.1 | ANKRD36 | 0.523756326 | 5.08E-39 |
| AC026355.1 | ANKRD36C | 0.533539669 | 1.09E-40 |
| AC026355.1 | ANKRD44 | 0.599407535 | 1.72E-53 |
| AC026355.1 | ANKRD50 | 0.669676587 | 6.92E-71 |
| AC026355.1 | ANKRD61 | 0.702397789 | 9.83E-81 |
| AL606489.1 | ANKRD61 | 0.50018241 | 3.25E-35 |
| AC026355.1 | AP001931.1 | 0.593663704 | 2.95E-52 |
| AL606489.1 | AP001931.1 | 0.524498598 | 3.81E-39 |
| AC026355.1 | AP4E1 | 0.547141301 | 4.19E-43 |
| AC026355.1 | AP5M1 | 0.558848347 | 2.85E-45 |
| AC026355.1 | APC | 0.631106085 | 8.77E-61 |
| AC026355.1 | APPBP2 | 0.509627384 | 1.05E-36 |
| AC026355.1 | AQP11 | 0.580034333 | 2.02E-49 |
| AC026355.1 | ARAP2 | 0.599965833 | 1.30E-53 |
| AL606489.1 | ARAP2 | 0.551758842 | 5.99E-44 |
| AL606489.1 | ARFGEF2 | 0.513974615 | 2.10E-37 |
| AL606489.1 | ARHGAP32 | 0.518881346 | 3.29E-38 |
| AC026355.1 | ARHGAP5 | 0.555954951 | 9.96E-45 |
| AC026355.1 | ARHGEF38 | 0.512049119 | 4.30E-37 |
| AC026355.1 | ARID2 | 0.651602356 | 5.73E-66 |
| AL606489.1 | ARID2 | 0.536286891 | 3.61E-41 |
| AC026355.1 | ARIH1 | 0.603345842 | 2.36E-54 |
| LINC01843 | ARL14 | 0.542467739 | 2.91E-42 |
| AC026355.1 | ARL5A | 0.546115249 | 6.43E-43 |
| AC026355.1 | ARMC8 | 0.504138055 | 7.84E-36 |
| AL606489.1 | ASAP2 | 0.53093636 | 3.06E-40 |
| AC026355.1 | ASH1L | 0.648542426 | 3.61E-65 |
| AC026355.1 | ASXL2 | 0.523664961 | 5.26E-39 |
| AC026355.1 | ATAD2B | 0.715783043 | 3.67E-85 |
| AL606489.1 | ATAD2B | 0.520984251 | 1.48E-38 |
| AC026355.1 | ATAD5 | 0.585805391 | 1.32E-50 |
| AC026355.1 | ATF7IP | 0.553112635 | 3.37E-44 |
| AC026355.1 | ATF7IP2 | 0.626949133 | 8.86E-60 |
| AC026355.1 | ATG12 | 0.614866559 | 6.05E-57 |
| AC026355.1 | ATG2B | 0.565860652 | 1.30E-46 |
| AC026355.1 | ATM | 0.688099768 | 2.86E-76 |
| AL606489.1 | ATP11B | 0.630433934 | 1.28E-60 |
| AC026355.1 | ATP6AP1L | 0.524823052 | 3.36E-39 |
| AC026355.1 | ATP8B4 | 0.701945412 | 1.37E-80 |
| AC026355.1 | ATP9B | 0.60115275 | 7.15E-54 |
| AC026355.1 | ATR | 0.597253656 | 5.02E-53 |
| AL606489.1 | ATR | 0.527432724 | 1.22E-39 |
| AC026355.1 | ATRX | 0.630615389 | 1.15E-60 |
| AC026355.1 | ATXN1 | 0.698850929 | 1.33E-79 |
| AC026355.1 | ATXN2 | 0.554126505 | 2.18E-44 |
| AC026355.1 | ATXN3 | 0.611965965 | 2.78E-56 |
| AC026355.1 | ATXN7 | 0.639856411 | 5.99E-63 |
| AC026355.1 | AVL9 | 0.522564734 | 8.04E-39 |
| AC026355.1 | BAZ2B | 0.686884952 | 6.67E-76 |
| AL606489.1 | BAZ2B | 0.52444783 | 3.88E-39 |
| AC026355.1 | BBIP1 | 0.698601243 | 1.60E-79 |
| AC026355.1 | BBX | 0.522973127 | 6.87E-39 |
| AC026355.1 | BCLAF1 | 0.547220742 | 4.05E-43 |
| AC026355.1 | BCLAF3 | 0.555722359 | 1.10E-44 |
| AC026355.1 | BDP1 | 0.723217802 | 9.84E-88 |
| AC026355.1 | BIRC6 | 0.641591266 | 2.19E-63 |
| AL606489.1 | BIRC6 | 0.558511895 | 3.29E-45 |
| AC026355.1 | BMP2K | 0.603067574 | 2.72E-54 |
| AC026355.1 | BMPR2 | 0.574677057 | 2.41E-48 |
| AC026355.1 | BNIP2 | 0.549952811 | 1.29E-43 |
| AC026355.1 | BOD1L1 | 0.510908173 | 6.57E-37 |
| AC026355.1 | BPTF | 0.598493486 | 2.71E-53 |
| AC026355.1 | BRAF | 0.680602351 | 4.96E-74 |
| AC026355.1 | BRCA2 | 0.585419987 | 1.59E-50 |
| AL606489.1 | BRCA2 | 0.500612885 | 2.79E-35 |
| AC026355.1 | BRWD1 | 0.736031951 | 2.27E-92 |
| AC026355.1 | BRWD3 | 0.712645157 | 4.22E-84 |
| AC026355.1 | BTAF1 | 0.638384833 | 1.40E-62 |
| AC026355.1 | BTLA | 0.558235286 | 3.71E-45 |
| AC026355.1 | C16orf72 | 0.63189304 | 5.64E-61 |
| AC026355.1 | C18orf25 | 0.590714701 | 1.24E-51 |
| AC026355.1 | C2orf88 | 0.686121663 | 1.13E-75 |
| AC026355.1 | C5orf63 | 0.660651594 | 2.18E-68 |
| AC026355.1 | C8orf44 | 0.571758257 | 9.15E-48 |
| AC026355.1 | C9orf72 | 0.582931302 | 5.17E-50 |
| AC026355.1 | C9orf84 | 0.731233462 | 1.33E-90 |
| AC026355.1 | CAMKMT | 0.562591379 | 5.53E-46 |
| AC026355.1 | CAMSAP2 | 0.541499059 | 4.33E-42 |
| AC026355.1 | CAPN7 | 0.614388268 | 7.79E-57 |
| AC026355.1 | CARD8 | 0.591109696 | 1.03E-51 |
| AC026355.1 | CARF | 0.605047773 | 9.93E-55 |
| AC026355.1 | CASP8AP2 | 0.54665449 | 5.13E-43 |
| AC026355.1 | CBLB | 0.584877908 | 2.05E-50 |
| AC026355.1 | CBR4 | 0.584795284 | 2.14E-50 |
| AC026355.1 | CCDC102B | 0.523943342 | 4.72E-39 |
| AC026355.1 | CCDC122 | 0.561748442 | 8.01E-46 |
| AC026355.1 | CCDC14 | 0.552008463 | 5.39E-44 |
| AC026355.1 | CCDC18 | 0.6921676 | 1.63E-77 |
| AC026355.1 | CCDC200 | 0.62910917 | 2.67E-60 |
| AL606489.1 | CCDC200 | 0.570367454 | 1.72E-47 |
| AC026355.1 | CCDC39 | 0.540171839 | 7.46E-42 |
| AC026355.1 | CCDC66 | 0.608209674 | 1.96E-55 |
| AC026355.1 | CCDC82 | 0.514845011 | 1.51E-37 |
| AC026355.1 | CCDC88A | 0.571353821 | 1.10E-47 |
| AC026355.1 | CCNH | 0.695114132 | 1.99E-78 |
| AC026355.1 | CCNT2 | 0.638693861 | 1.17E-62 |
| AC026355.1 | CCSAP | 0.535796762 | 4.40E-41 |
| AC026355.1 | CCSER1 | 0.656858901 | 2.31E-67 |
| AC026355.1 | CDC73 | 0.551836085 | 5.80E-44 |
| AC026355.1 | CDK17 | 0.653786006 | 1.52E-66 |
| AC026355.1 | CENPC | 0.643643701 | 6.58E-64 |
| AC026355.1 | CEP120 | 0.525687487 | 2.40E-39 |
| AC026355.1 | CEP135 | 0.537176674 | 2.52E-41 |
| AC026355.1 | CEP152 | 0.525903748 | 2.21E-39 |
| AC026355.1 | CEP170 | 0.506020608 | 3.96E-36 |
| AC026355.1 | CEP192 | 0.523459093 | 5.69E-39 |
| AC026355.1 | CEP290 | 0.573000659 | 5.20E-48 |
| AC026355.1 | CEP295 | 0.568683222 | 3.67E-47 |
| AC026355.1 | CEP350 | 0.659744604 | 3.85E-68 |
| AC026355.1 | CEP57L1 | 0.514094458 | 2.00E-37 |
| AC026355.1 | CEP68 | 0.5509641 | 8.39E-44 |
| AC026355.1 | CEP83 | 0.54495171 | 1.04E-42 |
| AC026355.1 | CEP85L | 0.637710164 | 2.07E-62 |
| AL606489.1 | CEP85L | 0.525447702 | 2.64E-39 |
| AC026355.1 | CEP97 | 0.503971083 | 8.33E-36 |
| AC026355.1 | CEPT1 | 0.586446034 | 9.72E-51 |
| AC026355.1 | CFAP69 | 0.610171133 | 7.09E-56 |
| AC026355.1 | CHD1 | 0.674379636 | 3.19E-72 |
| AC026355.1 | CHD2 | 0.564905418 | 1.99E-46 |
| AC026355.1 | CHD9 | 0.662931918 | 5.20E-69 |
| AL606489.1 | CHD9 | 0.527686086 | 1.10E-39 |
| AC026355.1 | CHIC1 | 0.686929954 | 6.46E-76 |
| AC026355.1 | CHORDC1 | 0.598638789 | 2.52E-53 |
| LINC01843 | CHST4 | 0.542467536 | 2.91E-42 |
| AC026355.1 | CLASP2 | 0.641182472 | 2.78E-63 |
| AC026355.1 | CLEC2D | 0.638794238 | 1.11E-62 |
| AC026355.1 | CLHC1 | 0.710769729 | 1.79E-83 |
| AC026355.1 | CLK4 | 0.542418591 | 2.97E-42 |
| AC026355.1 | CLOCK | 0.716465923 | 2.15E-85 |
| AC026355.1 | CNOT4 | 0.608500249 | 1.69E-55 |
| AC026355.1 | CNOT6L | 0.675181408 | 1.87E-72 |
| AC026355.1 | COX20 | 0.648945486 | 2.84E-65 |
| AC026355.1 | CPEB2 | 0.603342916 | 2.36E-54 |
| AC026355.1 | CPEB4 | 0.628848992 | 3.09E-60 |
| AC026355.1 | CPLANE1 | 0.642177654 | 1.55E-63 |
| AC026355.1 | CPSF6 | 0.534545403 | 7.27E-41 |
| AC026355.1 | CRBN | 0.545739605 | 7.52E-43 |
| AC026355.1 | CREB1 | 0.638801873 | 1.10E-62 |
| AC026355.1 | CREBRF | 0.634346403 | 1.41E-61 |
| AC026355.1 | CRLF3 | 0.537937921 | 1.85E-41 |
| AC026355.1 | CRYBG3 | 0.596349287 | 7.86E-53 |
| AC026355.1 | CSNK1G3 | 0.579469216 | 2.62E-49 |
| AC026355.1 | CTDSPL2 | 0.568114176 | 4.74E-47 |
| AC026355.1 | CUL5 | 0.53635283 | 3.51E-41 |
| AC026355.1 | DCAF10 | 0.521467728 | 1.23E-38 |
| AC026355.1 | DCAF17 | 0.513357242 | 2.64E-37 |
| AC026355.1 | DCP2 | 0.661411644 | 1.35E-68 |
| AC026355.1 | DCTN4 | 0.535274199 | 5.42E-41 |
| AC026355.1 | DCUN1D1 | 0.507919391 | 1.98E-36 |
| AC026355.1 | DCUN1D4 | 0.591599548 | 8.09E-52 |
| AC026355.1 | DDHD1 | 0.625217232 | 2.30E-59 |
| AL606489.1 | DDX60L | 0.585718656 | 1.38E-50 |
| AC026355.1 | DENND1B | 0.697748158 | 2.97E-79 |
| AC026355.1 | DENND4A | 0.634894486 | 1.03E-61 |
| AL606489.1 | DENND4A | 0.52058605 | 1.72E-38 |
| AC026355.1 | DENND4C | 0.552871226 | 3.73E-44 |
| AC026355.1 | DGKE | 0.581445123 | 1.04E-49 |
| AL606489.1 | DGKE | 0.52623967 | 1.94E-39 |
| AC026355.1 | DGKH | 0.699214146 | 1.02E-79 |
| AL606489.1 | DGKH | 0.566960653 | 7.96E-47 |
| AC026355.1 | DHX36 | 0.525017497 | 3.11E-39 |
| AC026355.1 | DICER1 | 0.619790523 | 4.38E-58 |
| AL606489.1 | DIP2B | 0.518836023 | 3.35E-38 |
| AC026355.1 | DMTF1 | 0.724910485 | 2.49E-88 |
| AC026355.1 | DMXL1 | 0.674628356 | 2.70E-72 |
| AC026355.1 | DMXL2 | 0.667563026 | 2.71E-70 |
| AL606489.1 | DMXL2 | 0.504704168 | 6.38E-36 |
| AC026355.1 | DNAH14 | 0.602835555 | 3.06E-54 |
| AC026355.1 | DNAJB14 | 0.705683339 | 8.49E-82 |
| AC026355.1 | DNAJC13 | 0.500668238 | 2.74E-35 |
| AC026355.1 | DNAJC24 | 0.60622079 | 5.45E-55 |
| AC026355.1 | DOCK10 | 0.528750784 | 7.25E-40 |
| AC026355.1 | DOCK4 | 0.600365382 | 1.06E-53 |
| AC026355.1 | DOP1A | 0.58892765 | 2.95E-51 |
| AC026355.1 | DPH6 | 0.600307362 | 1.09E-53 |
| AC026355.1 | DPP8 | 0.60521716 | 9.11E-55 |
| AC026355.1 | DPY19L3 | 0.523362367 | 5.91E-39 |
| AC026355.1 | DTWD1 | 0.661949327 | 9.66E-69 |
| AC026355.1 | DTWD2 | 0.515673728 | 1.11E-37 |
| AC026355.1 | DYRK1A | 0.565385461 | 1.61E-46 |
| AC026355.1 | EBLN2 | 0.637844519 | 1.91E-62 |
| AL606489.1 | EDEM3 | 0.547029137 | 4.39E-43 |
| AC026355.1 | EEA1 | 0.577975319 | 5.26E-49 |
| AC026355.1 | EFCAB13 | 0.781675402 | 2.30E-111 |
| AC026355.1 | ELF2 | 0.586175603 | 1.11E-50 |
| AC026355.1 | ELK4 | 0.707192235 | 2.73E-82 |
| AC026355.1 | EMSY | 0.509830396 | 9.78E-37 |
| AC026355.1 | ENTPD1 | 0.524155474 | 4.35E-39 |
| AC026355.1 | EPC1 | 0.650292948 | 1.26E-65 |
| AC026355.1 | EPG5 | 0.502977059 | 1.19E-35 |
| AC026355.1 | EPM2AIP1 | 0.59741129 | 4.64E-53 |
| AC026355.1 | EPS15 | 0.563668779 | 3.44E-46 |
| AC026355.1 | ERBIN | 0.662948158 | 5.14E-69 |
| AC026355.1 | ERCC4 | 0.538248514 | 1.63E-41 |
| AC026355.1 | ERCC6 | 0.63327287 | 2.59E-61 |
| AC026355.1 | ERCC6L2 | 0.652872386 | 2.65E-66 |
| AL606489.1 | ERCC6L2 | 0.53182081 | 2.15E-40 |
| AC026355.1 | EVI5 | 0.566780188 | 8.62E-47 |
| AC026355.1 | EXOC8 | 0.534485789 | 7.44E-41 |
| AC026355.1 | EXOG | 0.608471308 | 1.71E-55 |
| AC026355.1 | FAM126B | 0.644512085 | 3.95E-64 |
| AC026355.1 | FAM135A | 0.533719024 | 1.01E-40 |
| AL606489.1 | FAM135A | 0.585221565 | 1.74E-50 |
| AC026355.1 | FAM13B | 0.591098154 | 1.03E-51 |
| AC026355.1 | FAM160B1 | 0.58316364 | 4.63E-50 |
| AC026355.1 | FAM172A | 0.552739005 | 3.95E-44 |
| AC026355.1 | FAM185A | 0.643351821 | 7.82E-64 |
| AC026355.1 | FAM208A | 0.609946652 | 7.97E-56 |
| AC026355.1 | FAM208B | 0.525613623 | 2.47E-39 |
| AC026355.1 | FAM214A | 0.671237087 | 2.51E-71 |
| AC026355.1 | FAM76B | 0.516158073 | 9.23E-38 |
| AC026355.1 | FAM92A | 0.531673609 | 2.28E-40 |
| AC026355.1 | FANCC | 0.511596387 | 5.09E-37 |
| AL606489.1 | FARP2 | 0.565881175 | 1.29E-46 |
| AC026355.1 | FAT4 | 0.506089363 | 3.86E-36 |
| AC026355.1 | FBXL13 | 0.606331337 | 5.15E-55 |
| AC026355.1 | FBXL2 | 0.541916047 | 3.65E-42 |
| AC026355.1 | FBXL20 | 0.517849409 | 4.87E-38 |
| AC026355.1 | FBXL4 | 0.635882113 | 5.88E-62 |
| AC026355.1 | FBXO11 | 0.553587811 | 2.75E-44 |
| AC026355.1 | FBXO30 | 0.527211308 | 1.32E-39 |
| AC026355.1 | FBXW7 | 0.565175589 | 1.76E-46 |
| AC026355.1 | FEM1C | 0.523782751 | 5.03E-39 |
| AC026355.1 | FER | 0.726975701 | 4.58E-89 |
| AL606489.1 | FGD4 | 0.600738335 | 8.81E-54 |
| AC026355.1 | FGFR1OP | 0.504108315 | 7.92E-36 |
| AC026355.1 | FKTN | 0.540529204 | 6.45E-42 |
| AL606489.1 | FMN1 | 0.529310713 | 5.81E-40 |
| AC026355.1 | FMR1 | 0.501525898 | 2.01E-35 |
| AC026355.1 | FNIP1 | 0.673618323 | 5.26E-72 |
| AC026355.1 | FOXN2 | 0.538879756 | 1.26E-41 |
| AC026355.1 | FRA10AC1 | 0.565961987 | 1.24E-46 |
| AC026355.1 | FRK | 0.524195335 | 4.28E-39 |
| AL606489.1 | FRK | 0.500639238 | 2.76E-35 |
| AC026355.1 | FRYL | 0.583305224 | 4.33E-50 |
| AL606489.1 | FRYL | 0.601529161 | 5.91E-54 |
| AL606489.1 | FUT4 | 0.526770218 | 1.57E-39 |
| AC026355.1 | G3BP1 | 0.526283822 | 1.90E-39 |
| AC026355.1 | GAB1 | 0.564384152 | 2.50E-46 |
| AC026355.1 | GABPB1 | 0.688313279 | 2.47E-76 |
| AC026355.1 | GAN | 0.559827585 | 1.86E-45 |
| AL606489.1 | GAN | 0.500920358 | 2.50E-35 |
| AL606489.1 | GCC2 | 0.554610071 | 1.77E-44 |
| AC026355.1 | GDAP2 | 0.733574628 | 1.85E-91 |
| AC026355.1 | GEN1 | 0.537178861 | 2.52E-41 |
| AC026355.1 | GIMAP5 | 0.539880779 | 8.40E-42 |
| AC026355.1 | GIT2 | 0.536667383 | 3.10E-41 |
| AC026355.1 | GNPDA2 | 0.596286336 | 8.11E-53 |
| AC026355.1 | GNRH1 | 0.57245433 | 6.67E-48 |
| AL606489.1 | GOLGA4 | 0.501229642 | 2.24E-35 |
| AL606489.1 | GOLGB1 | 0.501990231 | 1.70E-35 |
| AC026355.1 | GPATCH2 | 0.628246941 | 4.32E-60 |
| AC026355.1 | GPATCH2L | 0.729276058 | 6.82E-90 |
| AL606489.1 | GPATCH2L | 0.520401766 | 1.84E-38 |
| AC026355.1 | GPR174 | 0.564564019 | 2.31E-46 |
| AC026355.1 | GPR18 | 0.787406458 | 4.48E-114 |
| AC026355.1 | GPR82 | 0.778063465 | 1.07E-109 |
| AC026355.1 | GPRIN3 | 0.561026817 | 1.10E-45 |
| AC026355.1 | GSAP | 0.531190099 | 2.77E-40 |
| AC026355.1 | GTPBP10 | 0.501012565 | 2.42E-35 |
| AC026355.1 | GUCY1A2 | 0.601202792 | 6.97E-54 |
| AC026355.1 | GXYLT2 | 0.533513673 | 1.10E-40 |
| AC026355.1 | HAUS3 | 0.504757694 | 6.26E-36 |
| AC026355.1 | HCFC2 | 0.589456779 | 2.29E-51 |
| AC026355.1 | HECTD2 | 0.705835777 | 7.57E-82 |
| AC026355.1 | HELB | 0.691594067 | 2.45E-77 |
| AL606489.1 | HELB | 0.506907915 | 2.86E-36 |
| AC026355.1 | HELZ | 0.683885761 | 5.29E-75 |
| AC026355.1 | HERC1 | 0.58896445 | 2.90E-51 |
| AC026355.1 | HERC4 | 0.664234507 | 2.28E-69 |
| AC026355.1 | HIPK3 | 0.551564769 | 6.50E-44 |
| AC026355.1 | HIVEP1 | 0.582166014 | 7.41E-50 |
| AC026355.1 | HMBOX1 | 0.729029549 | 8.37E-90 |
| AC026355.1 | HNRNPH1 | 0.516297494 | 8.76E-38 |
| AC026355.1 | HOOK3 | 0.544552936 | 1.23E-42 |
| LINC01843 | HSD17B2 | 0.502857113 | 1.25E-35 |
| AL606489.1 | IBTK | 0.504513076 | 6.84E-36 |
| AC026355.1 | ICE2 | 0.604070736 | 1.63E-54 |
| AC026355.1 | IGIP | 0.610189453 | 7.03E-56 |
| AC026355.1 | IKZF2 | 0.700737978 | 3.35E-80 |
| AC026355.1 | IL15 | 0.546685591 | 5.07E-43 |
| LINC01843 | IL1R2 | 0.544791291 | 1.11E-42 |
| AC026355.1 | IL6ST | 0.557959981 | 4.19E-45 |
| AC026355.1 | INO80D | 0.720341253 | 9.95E-87 |
| AL606489.1 | INO80D | 0.558547274 | 3.24E-45 |
| AC026355.1 | INSYN2 | 0.644891214 | 3.16E-64 |
| AC026355.1 | INTS6 | 0.730102658 | 3.43E-90 |
| AL606489.1 | INTS6 | 0.554390489 | 1.95E-44 |
| AC026355.1 | INTS6L | 0.532425937 | 1.69E-40 |
| AC026355.1 | INTU | 0.764501056 | 1.03E-103 |
| AC026355.1 | INVS | 0.562284847 | 6.33E-46 |
| AL606489.1 | INVS | 0.529552388 | 5.29E-40 |
| AC026355.1 | IREB2 | 0.501145908 | 2.31E-35 |
| AC026355.1 | ITSN2 | 0.50556802 | 4.66E-36 |
| AC026355.1 | JAK2 | 0.503702144 | 9.18E-36 |
| AC026355.1 | JMJD1C | 0.595562386 | 1.16E-52 |
| AL606489.1 | JMJD1C | 0.521115944 | 1.40E-38 |
| AC026355.1 | JMY | 0.61946054 | 5.23E-58 |
| AC026355.1 | KANSL1 | 0.565273757 | 1.69E-46 |
| AC026355.1 | KANSL1L | 0.631480303 | 7.11E-61 |
| AC026355.1 | KATNAL1 | 0.541662342 | 4.05E-42 |
| AC026355.1 | KCNAB1 | 0.634667544 | 1.17E-61 |
| AC026355.1 | KCNRG | 0.530349534 | 3.86E-40 |
| AC026355.1 | KDM4C | 0.622401012 | 1.07E-58 |
| AC026355.1 | KDM7A | 0.659467334 | 4.57E-68 |
| AC026355.1 | KIAA1109 | 0.680093152 | 7.00E-74 |
| AC026355.1 | KIAA1551 | 0.567422896 | 6.47E-47 |
| AL606489.1 | KIAA1551 | 0.529870836 | 4.66E-40 |
| AC026355.1 | KIAA2026 | 0.674784251 | 2.44E-72 |
| AC026355.1 | KLC1 | 0.530980633 | 3.01E-40 |
| AC026355.1 | KLF12 | 0.579631248 | 2.43E-49 |
| AC026355.1 | KLF8 | 0.523177664 | 6.35E-39 |
| AC026355.1 | KLHDC1 | 0.633616048 | 2.13E-61 |
| AC026355.1 | KLHL15 | 0.535082303 | 5.86E-41 |
| AC026355.1 | KLHL24 | 0.515105581 | 1.37E-37 |
| AC026355.1 | KLHL28 | 0.517996522 | 4.61E-38 |
| AC026355.1 | KMT2A | 0.552384385 | 4.59E-44 |
| AL606489.1 | KMT2A | 0.516718508 | 7.47E-38 |
| AC026355.1 | KMT2C | 0.712463328 | 4.86E-84 |
| AC026355.1 | KMT2E | 0.537286749 | 2.41E-41 |
| AC026355.1 | KPNA5 | 0.589508303 | 2.23E-51 |
| AC026355.1 | KRIT1 | 0.521762173 | 1.09E-38 |
| AC026355.1 | LARP4 | 0.569508516 | 2.53E-47 |
| AC026355.1 | LATS1 | 0.585936072 | 1.24E-50 |
| AC026355.1 | LCOR | 0.632705891 | 3.57E-61 |
| AL606489.1 | LCOR | 0.544667439 | 1.17E-42 |
| AC026355.1 | LCORL | 0.679689842 | 9.19E-74 |
| AC026355.1 | LIN54 | 0.504968261 | 5.80E-36 |
| AC026355.1 | LIN7C | 0.614489579 | 7.39E-57 |
| AC026355.1 | LNPEP | 0.695455018 | 1.56E-78 |
| AC026355.1 | LPP | 0.759809862 | 9.81E-102 |
| AL606489.1 | LRCH1 | 0.537829989 | 1.93E-41 |
| AC026355.1 | LRCH3 | 0.60371309 | 1.96E-54 |
| AL606489.1 | LRCH3 | 0.556050363 | 9.55E-45 |
| AC026355.1 | LRIG2 | 0.637760113 | 2.01E-62 |
| AC026355.1 | LRP2BP | 0.678919308 | 1.54E-73 |
| AC026355.1 | LRP6 | 0.535525235 | 4.90E-41 |
| AC026355.1 | LRRFIP2 | 0.528821379 | 7.05E-40 |
| AC026355.1 | LRRN3 | 0.624507988 | 3.39E-59 |
| AC026355.1 | LSMEM1 | 0.551384415 | 7.02E-44 |
| AC026355.1 | LTN1 | 0.616285377 | 2.85E-57 |
| AC026355.1 | LUC7L2 | 0.572075917 | 7.92E-48 |
| AC026355.1 | LYRM7 | 0.607364241 | 3.03E-55 |
| AC026355.1 | LYSMD3 | 0.564456688 | 2.43E-46 |
| AC026355.1 | LYST | 0.717022652 | 1.39E-85 |
| AC026355.1 | MACF1 | 0.580327341 | 1.76E-49 |
| AC026355.1 | MAK | 0.660353834 | 2.63E-68 |
| AC026355.1 | MAN1A2 | 0.502972075 | 1.19E-35 |
| AC026355.1 | MAP3K1 | 0.539206645 | 1.11E-41 |
| AC026355.1 | MAP3K2 | 0.661804272 | 1.06E-68 |
| AL606489.1 | MAP3K2 | 0.547801859 | 3.18E-43 |
| AC026355.1 | MBD5 | 0.640927279 | 3.22E-63 |
| AC026355.1 | MBLAC2 | 0.537931803 | 1.86E-41 |
| AC026355.1 | MBNL1 | 0.567216995 | 7.09E-47 |
| AC026355.1 | MBNL2 | 0.527521776 | 1.17E-39 |
| AC026355.1 | MBNL3 | 0.515623706 | 1.13E-37 |
| AC026355.1 | MBTD1 | 0.522950498 | 6.93E-39 |
| AC026355.1 | MCTP1 | 0.626959453 | 8.81E-60 |
| AC026355.1 | MCTP2 | 0.552658983 | 4.08E-44 |
| AC026355.1 | MDM4 | 0.75069027 | 5.11E-98 |
| AC026355.1 | MED13 | 0.550029209 | 1.25E-43 |
| AC026355.1 | MEF2A | 0.532955836 | 1.37E-40 |
| AC026355.1 | MEMO1 | 0.804728312 | 8.34E-123 |
| AC026355.1 | METTL15 | 0.590651562 | 1.28E-51 |
| AC026355.1 | MFSD4B | 0.638492166 | 1.32E-62 |
| AC026355.1 | MFSD8 | 0.527633825 | 1.12E-39 |
| AC026355.1 | MGA | 0.598105515 | 3.29E-53 |
| AC026355.1 | MICU3 | 0.616942666 | 2.01E-57 |
| AC026355.1 | MIER1 | 0.554034615 | 2.27E-44 |
| AC026355.1 | MINDY2 | 0.639377932 | 7.90E-63 |
| AC026355.1 | MKLN1 | 0.776165798 | 7.77E-109 |
| AL606489.1 | MKLN1 | 0.513759246 | 2.27E-37 |
| AC026355.1 | MLH3 | 0.633224488 | 2.66E-61 |
| AC026355.1 | MLLT10 | 0.518272335 | 4.15E-38 |
| AC026355.1 | MLYCD | 0.531951142 | 2.05E-40 |
| AC026355.1 | MMS22L | 0.552181912 | 5.00E-44 |
| AC026355.1 | MOB1B | 0.624450827 | 3.50E-59 |
| AC026355.1 | MON2 | 0.691713715 | 2.25E-77 |
| AL606489.1 | MON2 | 0.53104772 | 2.93E-40 |
| AC026355.1 | MORC3 | 0.5504484 | 1.04E-43 |
| AC026355.1 | MOSMO | 0.601200942 | 6.98E-54 |
| AC026355.1 | MPHOSPH9 | 0.573215885 | 4.71E-48 |
| AC026355.1 | MPP6 | 0.506729922 | 3.05E-36 |
| AC026355.1 | MRTFB | 0.714012663 | 1.46E-84 |
| AC026355.1 | MTF2 | 0.527194353 | 1.33E-39 |
| AC026355.1 | MTHFD2L | 0.663797896 | 3.00E-69 |
| AC026355.1 | MTMR9 | 0.602736682 | 3.21E-54 |
| AC026355.1 | MTX3 | 0.70049482 | 4.00E-80 |
| AL606489.1 | MXD1 | 0.574773704 | 2.31E-48 |
| AC026355.1 | MYCBP2 | 0.602191185 | 4.23E-54 |
| AC026355.1 | MYO9A | 0.646946448 | 9.35E-65 |
| AC026355.1 | MYSM1 | 0.692664721 | 1.15E-77 |
| AC026355.1 | N4BP2 | 0.567942999 | 5.12E-47 |
| AC026355.1 | N4BP2L2 | 0.745454729 | 5.89E-96 |
| AC026355.1 | NAA25 | 0.531797318 | 2.17E-40 |
| AC026355.1 | NABP1 | 0.593160059 | 3.78E-52 |
| AC026355.1 | NAPB | 0.547940123 | 3.00E-43 |
| AC026355.1 | NAPEPLD | 0.520279747 | 1.93E-38 |
| AC026355.1 | NBEAL1 | 0.665713556 | 8.88E-70 |
| AL606489.1 | NBEAL1 | 0.531836917 | 2.14E-40 |
| AC026355.1 | NEK7 | 0.510830439 | 6.76E-37 |
| AC026355.1 | NEMF | 0.504501842 | 6.87E-36 |
| AC026355.1 | NEMP2 | 0.523912619 | 4.78E-39 |
| AL606489.1 | NEMP2 | 0.514471517 | 1.74E-37 |
| AC026355.1 | NF1 | 0.668857875 | 1.18E-70 |
| AC026355.1 | NFAT5 | 0.692934603 | 9.47E-78 |
| AC026355.1 | NFIA | 0.567262431 | 6.95E-47 |
| AC026355.1 | NFIB | 0.612854679 | 1.75E-56 |
| AC026355.1 | NHLRC2 | 0.631742068 | 6.13E-61 |
| AC026355.1 | NIN | 0.505634762 | 4.55E-36 |
| AC026355.1 | NKTR | 0.71143878 | 1.07E-83 |
| AC026355.1 | NPAT | 0.597761627 | 3.90E-53 |
| AC026355.1 | NPHP3 | 0.52659335 | 1.69E-39 |
| AC026355.1 | NR2C2 | 0.56458865 | 2.29E-46 |
| AC026355.1 | NRIP1 | 0.559406363 | 2.23E-45 |
| AC026355.1 | NSD1 | 0.527595344 | 1.14E-39 |
| AC026355.1 | NSUN3 | 0.585527986 | 1.51E-50 |
| AC026355.1 | NUDT13 | 0.669992487 | 5.64E-71 |
| AC026355.1 | NUFIP2 | 0.693448925 | 6.57E-78 |
| AC026355.1 | OCLM | 0.750542985 | 5.85E-98 |
| AC026355.1 | ODF2L | 0.645281072 | 2.51E-64 |
| AC026355.1 | OGT | 0.525233109 | 2.86E-39 |
| AC026355.1 | OMG | 0.547620721 | 3.43E-43 |
| AC026355.1 | OSBPL8 | 0.60749166 | 2.84E-55 |
| AC026355.1 | OTUD4 | 0.568205273 | 4.55E-47 |
| AC026355.1 | OTULIN | 0.50967729 | 1.03E-36 |
| AC026355.1 | OXNAD1 | 0.670861143 | 3.21E-71 |
| AC026355.1 | PACRGL | 0.53901831 | 1.19E-41 |
| AC026355.1 | PAN3 | 0.585078713 | 1.87E-50 |
| AL606489.1 | PAN3 | 0.51445359 | 1.75E-37 |
| AC026355.1 | PANK3 | 0.684784575 | 2.85E-75 |
| AC026355.1 | PAPOLG | 0.591503952 | 8.48E-52 |
| AC026355.1 | PARP8 | 0.677030914 | 5.48E-73 |
| AC026355.1 | PATJ | 0.514082424 | 2.01E-37 |
| AC026355.1 | PAXBP1 | 0.593584646 | 3.07E-52 |
| AC026355.1 | PBRM1 | 0.530503425 | 3.63E-40 |
| AC026355.1 | PCBD2 | 0.573026591 | 5.13E-48 |
| AC026355.1 | PCDHB12 | 0.626296645 | 1.27E-59 |
| AC026355.1 | PCDHB13 | 0.530265088 | 3.99E-40 |
| AC026355.1 | PCF11 | 0.528887134 | 6.87E-40 |
| AC026355.1 | PCMTD1 | 0.559493632 | 2.15E-45 |
| AC026355.1 | PCNX1 | 0.663880816 | 2.85E-69 |
| AC026355.1 | PCNX4 | 0.561890487 | 7.53E-46 |
| AL606489.1 | PCSK7 | 0.54934451 | 1.66E-43 |
| AC026355.1 | PDE5A | 0.640204039 | 4.90E-63 |
| AC026355.1 | PDK1 | 0.505770376 | 4.33E-36 |
| AC026355.1 | PDS5B | 0.549013037 | 1.91E-43 |
| AL606489.1 | PDZD8 | 0.578400735 | 4.32E-49 |
| AC026355.1 | PGAP1 | 0.639066148 | 9.46E-63 |
| AC026355.1 | PGGT1B | 0.702900637 | 6.78E-81 |
| AC026355.1 | PHC3 | 0.712403274 | 5.09E-84 |
| AL606489.1 | PHC3 | 0.554627484 | 1.76E-44 |
| AC026355.1 | PHF20L1 | 0.63111954 | 8.70E-61 |
| AC026355.1 | PHF3 | 0.501416399 | 2.09E-35 |
| AC026355.1 | PHIP | 0.668187906 | 1.81E-70 |
| AC026355.1 | PHOSPHO2 | 0.654171786 | 1.20E-66 |
| AC026355.1 | PIAS1 | 0.544774268 | 1.12E-42 |
| AC026355.1 | PIAS2 | 0.688297664 | 2.49E-76 |
| AC026355.1 | PIGB | 0.591845867 | 7.18E-52 |
| AC026355.1 | PIK3C2A | 0.626288036 | 1.28E-59 |
| AL606489.1 | PIK3C2B | 0.501306021 | 2.18E-35 |
| AC026355.1 | PIK3CA | 0.562778653 | 5.09E-46 |
| AL606489.1 | PIK3CA | 0.512829983 | 3.21E-37 |
| AL606489.1 | PIK3CB | 0.514309622 | 1.85E-37 |
| AC026355.1 | PIK3R1 | 0.535891243 | 4.23E-41 |
| AC026355.1 | PIKFYVE | 0.644227524 | 4.67E-64 |
| AC026355.1 | PLEKHA3 | 0.725256796 | 1.87E-88 |
| AC026355.1 | PLEKHA8 | 0.591570727 | 8.21E-52 |
| AC026355.1 | PLEKHM3 | 0.568967463 | 3.23E-47 |
| AC026355.1 | PLXDC2 | 0.522771867 | 7.42E-39 |
| AC026355.1 | PMM2 | 0.536180487 | 3.77E-41 |
| AL606489.1 | PMM2 | 0.550885662 | 8.67E-44 |
| AC026355.1 | PNISR | 0.523474943 | 5.66E-39 |
| LINC01843 | POLD4 | 0.504945162 | 5.85E-36 |
| AC026355.1 | POLI | 0.556668081 | 7.32E-45 |
| AC026355.1 | POLK | 0.646667964 | 1.10E-64 |
| AC026355.1 | POU2F1 | 0.618398572 | 9.25E-58 |
| AC026355.1 | PPIP5K2 | 0.683340441 | 7.68E-75 |
| AC026355.1 | PPM1A | 0.56593236 | 1.26E-46 |
| AC026355.1 | PPP1R12A | 0.524798702 | 3.39E-39 |
| AL606489.1 | PPP1R15B | 0.501841326 | 1.80E-35 |
| AC026355.1 | PPP2R3A | 0.500166266 | 3.27E-35 |
| AC026355.1 | PPWD1 | 0.590406676 | 1.44E-51 |
| AC026355.1 | PREX2 | 0.592000425 | 6.66E-52 |
| AC026355.1 | PRKCE | 0.554611382 | 1.77E-44 |
| AC026355.1 | PRPF4B | 0.507819292 | 2.05E-36 |
| AC026355.1 | PSMG4 | 0.516615776 | 7.77E-38 |
| AC026355.1 | PTAR1 | 0.664791887 | 1.60E-69 |
| AC026355.1 | PTBP2 | 0.57907799 | 3.15E-49 |
| AL606489.1 | PTBP3 | 0.540056327 | 7.82E-42 |
| AC026355.1 | PTEN | 0.630720893 | 1.09E-60 |
| AC026355.1 | PTPDC1 | 0.578627522 | 3.89E-49 |
| AC026355.1 | PTPN4 | 0.569798711 | 2.22E-47 |
| AC026355.1 | PURA | 0.778120029 | 1.00E-109 |
| AC026355.1 | PURB | 0.566992867 | 7.84E-47 |
| AC026355.1 | PUS10 | 0.739441964 | 1.19E-93 |
| AC026355.1 | PUS7L | 0.742355929 | 9.27E-95 |
| AC026355.1 | PWWP2A | 0.551951545 | 5.52E-44 |
| AC026355.1 | QKI | 0.5993426 | 1.77E-53 |
| AC026355.1 | QSER1 | 0.503308326 | 1.06E-35 |
| AC026355.1 | RAD51B | 0.520392419 | 1.85E-38 |
| AC026355.1 | RALGPS2 | 0.550570258 | 9.91E-44 |
| AC026355.1 | RANBP17 | 0.632452145 | 4.11E-61 |
| AC026355.1 | RAPGEF6 | 0.628884931 | 3.03E-60 |
| AC026355.1 | RAPH1 | 0.580502342 | 1.62E-49 |
| AC026355.1 | RASA1 | 0.601316075 | 6.58E-54 |
| AC026355.1 | RASA2 | 0.645294787 | 2.49E-64 |
| AL606489.1 | RASA2 | 0.514549976 | 1.69E-37 |
| AC026355.1 | RASAL2 | 0.533529068 | 1.09E-40 |
| AC026355.1 | RASGEF1B | 0.515642865 | 1.12E-37 |
| AC026355.1 | RBAK | 0.531149203 | 2.81E-40 |
| AC026355.1 | RBM12B | 0.664535157 | 1.88E-69 |
| AC026355.1 | RBM14-RBM4 | 0.718387218 | 4.71E-86 |
| AC026355.1 | RBM15 | 0.598367756 | 2.88E-53 |
| AL606489.1 | RBM15 | 0.500884617 | 2.53E-35 |
| AC026355.1 | RBM25 | 0.504614038 | 6.60E-36 |
| AC026355.1 | RBM26 | 0.58296417 | 5.09E-50 |
| AC026355.1 | RBM27 | 0.585966797 | 1.22E-50 |
| AC026355.1 | RBM33 | 0.57616651 | 1.22E-48 |
| AC026355.1 | RBM39 | 0.56878838 | 3.50E-47 |
| AC026355.1 | RBM4 | 0.507785611 | 2.07E-36 |
| AC026355.1 | RBM41 | 0.566024583 | 1.21E-46 |
| AC026355.1 | RBMS1 | 0.586035414 | 1.18E-50 |
| AC026355.1 | RBMS3 | 0.536844181 | 2.88E-41 |
| AC026355.1 | RC3H1 | 0.746237248 | 2.92E-96 |
| AL606489.1 | RC3H1 | 0.529911821 | 4.59E-40 |
| AC026355.1 | RC3H2 | 0.577430195 | 6.78E-49 |
| AC026355.1 | RCOR3 | 0.57928745 | 2.86E-49 |
| LINC01843 | REG4 | 0.542040798 | 3.47E-42 |
| AC026355.1 | REL | 0.76214767 | 1.03E-102 |
| AC026355.1 | RELCH | 0.61008068 | 7.44E-56 |
| AC026355.1 | REST | 0.603180061 | 2.57E-54 |
| AC026355.1 | REV3L | 0.683453275 | 7.11E-75 |
| AC026355.1 | RFX3 | 0.589018433 | 2.83E-51 |
| AC026355.1 | RFX7 | 0.630651337 | 1.13E-60 |
| AC026355.1 | RIC1 | 0.67966686 | 9.33E-74 |
| AC026355.1 | RICTOR | 0.600510695 | 9.87E-54 |
| AC026355.1 | RIF1 | 0.616175898 | 3.03E-57 |
| AL606489.1 | RIF1 | 0.531935504 | 2.06E-40 |
| AC026355.1 | RLF | 0.508691639 | 1.49E-36 |
| AC026355.1 | RLIM | 0.659991302 | 3.30E-68 |
| AC026355.1 | RNF152 | 0.555927273 | 1.01E-44 |
| AC026355.1 | RNF169 | 0.643659891 | 6.52E-64 |
| AC026355.1 | RNF217 | 0.634764775 | 1.11E-61 |
| AC026355.1 | RNPC3 | 0.596719319 | 6.55E-53 |
| AL606489.1 | ROCK2 | 0.533961738 | 9.18E-41 |
| AC026355.1 | RORA | 0.720033405 | 1.27E-86 |
| AC026355.1 | RPAP2 | 0.653867297 | 1.45E-66 |
| AC026355.1 | RPS6KA3 | 0.504983621 | 5.77E-36 |
| AC026355.1 | RSBN1 | 0.516578409 | 7.88E-38 |
| AC026355.1 | RSBN1L | 0.530570891 | 3.54E-40 |
| AC026355.1 | RTTN | 0.520644779 | 1.68E-38 |
| AC026355.1 | RUFY2 | 0.651156395 | 7.50E-66 |
| AC026355.1 | RUFY3 | 0.662573401 | 6.52E-69 |
| AC026355.1 | RUNX1 | 0.513516875 | 2.49E-37 |
| AC026355.1 | RUNX1T1 | 0.601357261 | 6.45E-54 |
| AC026355.1 | S100PBP | 0.630967293 | 9.48E-61 |
| AC026355.1 | SAMD12 | 0.602730659 | 3.22E-54 |
| AC026355.1 | SAMD8 | 0.580554118 | 1.58E-49 |
| AC026355.1 | SARNP | 0.637311406 | 2.60E-62 |
| AC026355.1 | SCAF11 | 0.599111728 | 1.99E-53 |
| AL606489.1 | SCAF11 | 0.519763173 | 2.35E-38 |
| AC026355.1 | SCAF8 | 0.562180912 | 6.63E-46 |
| AC026355.1 | SCAI | 0.628574972 | 3.60E-60 |
| AC026355.1 | SCAPER | 0.520661196 | 1.67E-38 |
| AC026355.1 | SCLT1 | 0.61823232 | 1.01E-57 |
| AC026355.1 | SEC24A | 0.543437357 | 1.95E-42 |
| AC026355.1 | SECISBP2 | 0.531524209 | 2.42E-40 |
| AC026355.1 | SENP5 | 0.511726295 | 4.85E-37 |
| AC026355.1 | SENP6 | 0.514562204 | 1.68E-37 |
| AC026355.1 | SENP7 | 0.591028831 | 1.07E-51 |
| AC026355.1 | SEPSECS | 0.510012175 | 9.14E-37 |
| AC026355.1 | SESN3 | 0.535810366 | 4.37E-41 |
| AC026355.1 | SETD2 | 0.578377399 | 4.36E-49 |
| AC026355.1 | SETX | 0.616261912 | 2.89E-57 |
| AL606489.1 | SETX | 0.507506971 | 2.30E-36 |
| AC026355.1 | SFT2D2 | 0.680706238 | 4.62E-74 |
| AC026355.1 | SGIP1 | 0.61940862 | 5.38E-58 |
| AC026355.1 | SHPRH | 0.742687472 | 6.91E-95 |
| AL606489.1 | SHPRH | 0.511999011 | 4.38E-37 |
| AC026355.1 | SIAH1 | 0.511714566 | 4.87E-37 |
| AC026355.1 | SIKE1 | 0.517612282 | 5.33E-38 |
| AC026355.1 | SKIL | 0.540620373 | 6.21E-42 |
| AC026355.1 | SLC10A7 | 0.526960367 | 1.46E-39 |
| AC026355.1 | SLC25A36 | 0.617932402 | 1.19E-57 |
| AC026355.1 | SLC25A46 | 0.588830297 | 3.09E-51 |
| AC026355.1 | SLC30A4 | 0.657553675 | 1.50E-67 |
| AL606489.1 | SLC30A4 | 0.528620844 | 7.63E-40 |
| AC026355.1 | SLC30A7 | 0.574944684 | 2.13E-48 |
| AL606489.1 | SLC30A7 | 0.510738238 | 6.99E-37 |
| AC026355.1 | SLC35F5 | 0.510353104 | 8.06E-37 |
| AC026355.1 | SLC38A6 | 0.565365502 | 1.62E-46 |
| AC026355.1 | SLC4A7 | 0.689525365 | 1.05E-76 |
| AC026355.1 | SLC5A3 | 0.579011996 | 3.25E-49 |
| AC026355.1 | SLC8A1 | 0.559153556 | 2.49E-45 |
| AC026355.1 | SLF1 | 0.503507783 | 9.85E-36 |
| AC026355.1 | SLF2 | 0.645945177 | 1.69E-64 |
| AC026355.1 | SLFN12L | 0.626307253 | 1.26E-59 |
| AL606489.1 | SLMAP | 0.636246089 | 4.78E-62 |
| AC026355.1 | SMAD2 | 0.601884252 | 4.94E-54 |
| AC026355.1 | SMAD4 | 0.57713162 | 7.78E-49 |
| AC026355.1 | SMAD5 | 0.591595771 | 8.11E-52 |
| AL606489.1 | SMC5 | 0.520578953 | 1.72E-38 |
| AC026355.1 | SMCHD1 | 0.597666373 | 4.09E-53 |
| AC026355.1 | SMG1 | 0.608716627 | 1.51E-55 |
| AL606489.1 | SMG1 | 0.533478093 | 1.11E-40 |
| AC026355.1 | SMIM8 | 0.648851629 | 3.00E-65 |
| AC026355.1 | SMYD3 | 0.57286805 | 5.52E-48 |
| AC026355.1 | SNAPC3 | 0.544735257 | 1.14E-42 |
| AC026355.1 | SNTB2 | 0.557590858 | 4.91E-45 |
| AC026355.1 | SNX13 | 0.649547683 | 1.98E-65 |
| AC026355.1 | SOCS4 | 0.594662565 | 1.81E-52 |
| AC026355.1 | SOCS5 | 0.564440272 | 2.44E-46 |
| AC026355.1 | SOS1 | 0.554478338 | 1.88E-44 |
| AC026355.1 | SOS2 | 0.501690977 | 1.90E-35 |
| AL606489.1 | SP1 | 0.542687233 | 2.66E-42 |
| AC026355.1 | SP3 | 0.519657343 | 2.45E-38 |
| AL606489.1 | SPATA5 | 0.547969645 | 2.96E-43 |
| AC026355.1 | SPATA6L | 0.597080749 | 5.47E-53 |
| AC026355.1 | SPG11 | 0.56166687 | 8.30E-46 |
| AL606489.1 | SPG11 | 0.507704953 | 2.14E-36 |
| AC026355.1 | SPICE1 | 0.568146411 | 4.68E-47 |
| AC026355.1 | SPOPL | 0.518532783 | 3.76E-38 |
| AC026355.1 | SREK1 | 0.727408413 | 3.20E-89 |
| AC026355.1 | SRFBP1 | 0.506832974 | 2.94E-36 |
| AC026355.1 | SRSF10 | 0.538319324 | 1.59E-41 |
| AC026355.1 | SSBP2 | 0.538205294 | 1.66E-41 |
| AC026355.1 | SSH2 | 0.572374149 | 6.91E-48 |
| AC026355.1 | ST7L | 0.621594609 | 1.66E-58 |
| AC026355.1 | STEAP2 | 0.511358276 | 5.56E-37 |
| AC026355.1 | STRADA | 0.555980691 | 9.85E-45 |
| AC026355.1 | STRN | 0.5407006 | 6.01E-42 |
| AC026355.1 | STX17 | 0.612101993 | 2.59E-56 |
| AL606489.1 | STX17 | 0.52165389 | 1.14E-38 |
| AC026355.1 | STXBP4 | 0.569070956 | 3.09E-47 |
| AC026355.1 | STXBP5 | 0.641897107 | 1.83E-63 |
| AC026355.1 | STYX | 0.533379602 | 1.16E-40 |
| AC026355.1 | SUGT1 | 0.590311685 | 1.51E-51 |
| AC026355.1 | SUPT20H | 0.591740796 | 7.55E-52 |
| AC026355.1 | SWT1 | 0.516673225 | 7.60E-38 |
| AC026355.1 | SYNJ1 | 0.521827761 | 1.07E-38 |
| AC026355.1 | SYNPO2 | 0.515405144 | 1.23E-37 |
| AC026355.1 | TAF1D | 0.514713589 | 1.59E-37 |
| AC026355.1 | TAMM41 | 0.624623928 | 3.18E-59 |
| AC026355.1 | TANC2 | 0.527880844 | 1.02E-39 |
| AC026355.1 | TAOK1 | 0.671227982 | 2.52E-71 |
| AC026355.1 | TARBP1 | 0.505789087 | 4.30E-36 |
| AC026355.1 | TAS2R14 | 0.746708864 | 1.91E-96 |
| AC026355.1 | TAS2R20 | 0.723844368 | 5.92E-88 |
| AC026355.1 | TBC1D12 | 0.595760072 | 1.05E-52 |
| AC026355.1 | TBC1D19 | 0.608770703 | 1.47E-55 |
| AC026355.1 | TBC1D32 | 0.616717879 | 2.27E-57 |
| AC026355.1 | TBCEL | 0.57172588 | 9.29E-48 |
| AC026355.1 | TBCK | 0.636129001 | 5.11E-62 |
| AC026355.1 | TBL1XR1 | 0.644823107 | 3.29E-64 |
| AC026355.1 | TCERG1 | 0.553403991 | 2.97E-44 |
| AC026355.1 | TCF4 | 0.54699212 | 4.46E-43 |
| AC026355.1 | TDRD3 | 0.536903723 | 2.81E-41 |
| AC026355.1 | TENT2 | 0.702333609 | 1.03E-80 |
| AC026355.1 | TET2 | 0.736193317 | 1.98E-92 |
| AC026355.1 | THAP6 | 0.657433071 | 1.62E-67 |
| AC026355.1 | TIA1 | 0.507549131 | 2.26E-36 |
| AL606489.1 | TM9SF3 | 0.521464607 | 1.23E-38 |
| AC026355.1 | TMEM161B | 0.724258457 | 4.23E-88 |
| AC026355.1 | TMEM168 | 0.584517213 | 2.44E-50 |
| AC026355.1 | TMEM170B | 0.559880779 | 1.81E-45 |
| AC026355.1 | TMEM33 | 0.500007707 | 3.46E-35 |
| AL606489.1 | TMEM87B | 0.508646029 | 1.51E-36 |
| AC026355.1 | TMPPE | 0.609910175 | 8.12E-56 |
| AL606489.1 | TMPPE | 0.595814206 | 1.02E-52 |
| AC026355.1 | TNPO1 | 0.57681757 | 9.00E-49 |
| AC026355.1 | TNRC6A | 0.560468439 | 1.40E-45 |
| AC026355.1 | TNRC6B | 0.665833835 | 8.22E-70 |
| AL606489.1 | TNRC6B | 0.525859095 | 2.25E-39 |
| AC026355.1 | TOR1AIP2 | 0.661305563 | 1.45E-68 |
| AC026355.1 | TRA2B | 0.596984159 | 5.74E-53 |
| AL606489.1 | TRA2B | 0.507637327 | 2.19E-36 |
| AC026355.1 | TRAF6 | 0.585065192 | 1.88E-50 |
| AL606489.1 | TRAF6 | 0.506014476 | 3.96E-36 |
| AC026355.1 | TRIM13 | 0.712729829 | 3.96E-84 |
| LINC01843 | TRIM15 | 0.521573854 | 1.18E-38 |
| AC026355.1 | TRIM23 | 0.540302896 | 7.07E-42 |
| AC026355.1 | TRIM33 | 0.568028049 | 4.93E-47 |
| AC026355.1 | TRIM38 | 0.500025191 | 3.44E-35 |
| AC026355.1 | TRIP11 | 0.57190355 | 8.57E-48 |
| AC026355.1 | TRMT13 | 0.568457831 | 4.07E-47 |
| AC026355.1 | TRNT1 | 0.530930993 | 3.07E-40 |
| AC026355.1 | TROVE2 | 0.708651509 | 9.02E-83 |
| AC026355.1 | TRPM7 | 0.646421712 | 1.28E-64 |
| AL606489.1 | TRPM7 | 0.524549407 | 3.73E-39 |
| AC026355.1 | TRPS1 | 0.636307222 | 4.62E-62 |
| AC026355.1 | TSSK4 | 0.633780362 | 1.94E-61 |
| AC026355.1 | TTBK2 | 0.682411837 | 1.45E-74 |
| AC026355.1 | TTC14 | 0.596368497 | 7.79E-53 |
| AC026355.1 | TTC3 | 0.528104257 | 9.34E-40 |
| AC026355.1 | TTC6 | 0.626865375 | 9.28E-60 |
| AC026355.1 | TUBE1 | 0.525221372 | 2.88E-39 |
| AC026355.1 | TULP4 | 0.620342101 | 3.26E-58 |
| AC026355.1 | TUT4 | 0.626432285 | 1.18E-59 |
| AC026355.1 | TUT7 | 0.502972259 | 1.19E-35 |
| AL606489.1 | TUT7 | 0.593382106 | 3.39E-52 |
| AC026355.1 | TVP23C | 0.719673319 | 1.70E-86 |
| AL606489.1 | TVP23C | 0.548288681 | 2.59E-43 |
| AL606489.1 | TXK | 0.504373376 | 7.20E-36 |
| AC026355.1 | TYW5 | 0.672680174 | 9.76E-72 |
| AL606489.1 | TYW5 | 0.528190934 | 9.03E-40 |
| AC026355.1 | UBA5 | 0.539858748 | 8.48E-42 |
| AC026355.1 | UBA6 | 0.526898364 | 1.50E-39 |
| AL606489.1 | UBA6 | 0.530582058 | 3.52E-40 |
| AC026355.1 | UBE2V1 | 0.672673058 | 9.80E-72 |
| AL606489.1 | UBE2V1 | 0.515586346 | 1.14E-37 |
| AC026355.1 | UBE3A | 0.543194589 | 2.16E-42 |
| AC026355.1 | UBN2 | 0.78839208 | 1.50E-114 |
| AC026355.1 | UBR1 | 0.52084475 | 1.56E-38 |
| AL606489.1 | UBR1 | 0.504488252 | 6.91E-36 |
| AC026355.1 | UBXN7 | 0.52880683 | 7.09E-40 |
| AC026355.1 | UCHL5 | 0.532988819 | 1.35E-40 |
| AC026355.1 | UGGT2 | 0.582356029 | 6.78E-50 |
| AC026355.1 | UHMK1 | 0.503120917 | 1.13E-35 |
| AC026355.1 | UHRF1BP1L | 0.510400232 | 7.92E-37 |
| AC026355.1 | ULK4 | 0.62268342 | 9.17E-59 |
| AC026355.1 | USF3 | 0.67864323 | 1.86E-73 |
| AL606489.1 | USF3 | 0.50924086 | 1.22E-36 |
| AC026355.1 | USP15 | 0.584939936 | 1.99E-50 |
| AL606489.1 | USP15 | 0.507301038 | 2.48E-36 |
| AC026355.1 | USP24 | 0.526364875 | 1.84E-39 |
| AL606489.1 | USP24 | 0.512943163 | 3.08E-37 |
| AC026355.1 | USP3 | 0.535390308 | 5.18E-41 |
| AC026355.1 | USP34 | 0.705933386 | 7.04E-82 |
| AL606489.1 | USP34 | 0.545131671 | 9.68E-43 |
| AC026355.1 | USP37 | 0.562544935 | 5.64E-46 |
| AC026355.1 | USP45 | 0.743896489 | 2.37E-95 |
| AC026355.1 | USP53 | 0.611703141 | 3.19E-56 |
| AC026355.1 | UTRN | 0.559992273 | 1.73E-45 |
| AC026355.1 | VAMP4 | 0.578799147 | 3.59E-49 |
| AC026355.1 | VCPIP1 | 0.584264794 | 2.75E-50 |
| AC026355.1 | VMP1 | 0.674024833 | 4.03E-72 |
| AC026355.1 | VN1R1 | 0.526846944 | 1.53E-39 |
| AC026355.1 | VPS13A | 0.624680156 | 3.08E-59 |
| AL606489.1 | VPS13A | 0.526022597 | 2.11E-39 |
| AC026355.1 | VPS13B | 0.697586404 | 3.34E-79 |
| AL606489.1 | VPS13B | 0.538166021 | 1.69E-41 |
| AC026355.1 | VPS13C | 0.702658351 | 8.11E-81 |
| AC026355.1 | VPS13D | 0.570908734 | 1.35E-47 |
| AC026355.1 | VPS8 | 0.63016416 | 1.49E-60 |
| AL606489.1 | VPS8 | 0.529629806 | 5.13E-40 |
| AC026355.1 | WASHC4 | 0.598765577 | 2.37E-53 |
| AC026355.1 | WDFY2 | 0.523792864 | 5.01E-39 |
| AC026355.1 | WDFY3 | 0.692774287 | 1.06E-77 |
| AL606489.1 | WDFY3 | 0.528518087 | 7.94E-40 |
| AC026355.1 | WDR11 | 0.512252145 | 3.99E-37 |
| AC026355.1 | WDR26 | 0.578259424 | 4.61E-49 |
| AC026355.1 | WDR27 | 0.550616646 | 9.72E-44 |
| AC026355.1 | WDR36 | 0.538993672 | 1.21E-41 |
| AC026355.1 | WDR7 | 0.580436536 | 1.67E-49 |
| AC026355.1 | XIAP | 0.512853954 | 3.19E-37 |
| AC026355.1 | XPO4 | 0.616279442 | 2.86E-57 |
| AL606489.1 | XPO4 | 0.516169523 | 9.19E-38 |
| AC026355.1 | XRN1 | 0.623862144 | 4.82E-59 |
| AL606489.1 | XRN1 | 0.554181134 | 2.13E-44 |
| AC026355.1 | YAF2 | 0.724689096 | 2.98E-88 |
| AC026355.1 | YTHDC2 | 0.609922864 | 8.07E-56 |
| AC026355.1 | ZBED6 | 0.761851144 | 1.37E-102 |
| AL606489.1 | ZBED6 | 0.522774681 | 7.42E-39 |
| AC026355.1 | ZBTB11 | 0.528684485 | 7.44E-40 |
| AC026355.1 | ZBTB20 | 0.724274066 | 4.17E-88 |
| AL606489.1 | ZBTB20 | 0.516260842 | 8.88E-38 |
| AC026355.1 | ZBTB21 | 0.519604669 | 2.50E-38 |
| AC026355.1 | ZBTB25 | 0.647982997 | 5.04E-65 |
| AC026355.1 | ZBTB37 | 0.832838644 | 5.08E-139 |
| AC026355.1 | ZBTB38 | 0.501590161 | 1.97E-35 |
| AC026355.1 | ZBTB41 | 0.660719038 | 2.09E-68 |
| AC026355.1 | ZBTB43 | 0.515692947 | 1.10E-37 |
| AC026355.1 | ZBTB44 | 0.565373523 | 1.61E-46 |
| AC026355.1 | ZC3H11A | 0.637332505 | 2.57E-62 |
| AL606489.1 | ZC3H12C | 0.516570577 | 7.90E-38 |
| AC026355.1 | ZC3H6 | 0.652057797 | 4.35E-66 |
| AC026355.1 | ZDHHC17 | 0.68627577 | 1.02E-75 |
| AL606489.1 | ZDHHC20 | 0.522257834 | 9.05E-39 |
| AC026355.1 | ZDHHC21 | 0.715622752 | 4.16E-85 |
| AC026355.1 | ZEB1 | 0.516908096 | 6.96E-38 |
| AC026355.1 | ZEB2 | 0.671555265 | 2.04E-71 |
| AC026355.1 | ZFC3H1 | 0.653636683 | 1.67E-66 |
| AL606489.1 | ZFC3H1 | 0.512942726 | 3.08E-37 |
| AC026355.1 | ZFP14 | 0.519236411 | 2.88E-38 |
| AC026355.1 | ZFX | 0.599825878 | 1.39E-53 |
| AC026355.1 | ZFYVE16 | 0.709313609 | 5.45E-83 |
| AC026355.1 | ZGRF1 | 0.622846866 | 8.39E-59 |
| AC026355.1 | ZMAT3 | 0.543047325 | 2.29E-42 |
| AC026355.1 | ZMYM1 | 0.54302172 | 2.32E-42 |
| AC026355.1 | ZMYM2 | 0.666868771 | 4.24E-70 |
| AL606489.1 | ZMYM2 | 0.528442432 | 8.18E-40 |
| AC026355.1 | ZMYM6 | 0.634443229 | 1.33E-61 |
| AC026355.1 | ZNF10 | 0.531253991 | 2.70E-40 |
| AC026355.1 | ZNF107 | 0.600356502 | 1.07E-53 |
| AC026355.1 | ZNF117 | 0.575104935 | 1.98E-48 |
| AC026355.1 | ZNF121 | 0.621213357 | 2.03E-58 |
| AC026355.1 | ZNF124 | 0.640843952 | 3.38E-63 |
| AC026355.1 | ZNF138 | 0.540790649 | 5.79E-42 |
| AC026355.1 | ZNF141 | 0.698928958 | 1.26E-79 |
| AC026355.1 | ZNF148 | 0.65527019 | 6.13E-67 |
| AC026355.1 | ZNF154 | 0.639247205 | 8.52E-63 |
| AC026355.1 | ZNF160 | 0.500643876 | 2.76E-35 |
| AC026355.1 | ZNF17 | 0.5386185 | 1.40E-41 |
| AC026355.1 | ZNF207 | 0.741788504 | 1.53E-94 |
| AC026355.1 | ZNF235 | 0.692526291 | 1.27E-77 |
| AC026355.1 | ZNF236 | 0.507539647 | 2.27E-36 |
| AC026355.1 | ZNF248 | 0.588262814 | 4.07E-51 |
| AC026355.1 | ZNF25 | 0.588404035 | 3.80E-51 |
| AC026355.1 | ZNF254 | 0.632454084 | 4.11E-61 |
| AC026355.1 | ZNF26 | 0.631578807 | 6.72E-61 |
| AC026355.1 | ZNF264 | 0.645381036 | 2.37E-64 |
| AC026355.1 | ZNF267 | 0.564593048 | 2.28E-46 |
| AC026355.1 | ZNF280C | 0.503688828 | 9.22E-36 |
| AC026355.1 | ZNF280D | 0.682533217 | 1.33E-74 |
| AC026355.1 | ZNF283 | 0.693279433 | 7.41E-78 |
| AC026355.1 | ZNF292 | 0.63478703 | 1.10E-61 |
| AC026355.1 | ZNF326 | 0.586053701 | 1.17E-50 |
| AC026355.1 | ZNF33A | 0.624635716 | 3.16E-59 |
| AC026355.1 | ZNF354B | 0.506532791 | 3.28E-36 |
| AC026355.1 | ZNF37A | 0.534004157 | 9.02E-41 |
| AC026355.1 | ZNF407 | 0.672726595 | 9.46E-72 |
| AL606489.1 | ZNF407 | 0.507904744 | 1.99E-36 |
| AC026355.1 | ZNF417 | 0.622965819 | 7.86E-59 |
| AC026355.1 | ZNF431 | 0.582261132 | 7.09E-50 |
| AC026355.1 | ZNF433 | 0.554620868 | 1.77E-44 |
| AC026355.1 | ZNF441 | 0.528867644 | 6.92E-40 |
| AC026355.1 | ZNF449 | 0.599329076 | 1.79E-53 |
| AC026355.1 | ZNF451 | 0.721606244 | 3.61E-87 |
| AC026355.1 | ZNF460 | 0.706664541 | 4.06E-82 |
| AC026355.1 | ZNF484 | 0.586673556 | 8.72E-51 |
| AC026355.1 | ZNF493 | 0.713251597 | 2.64E-84 |
| AC026355.1 | ZNF506 | 0.687826972 | 3.46E-76 |
| AC026355.1 | ZNF507 | 0.583062 | 4.86E-50 |
| AC026355.1 | ZNF510 | 0.63421109 | 1.52E-61 |
| AC026355.1 | ZNF518A | 0.622095371 | 1.26E-58 |
| AL606489.1 | ZNF518A | 0.561251047 | 9.97E-46 |
| AC026355.1 | ZNF528 | 0.518442543 | 3.89E-38 |
| AC026355.1 | ZNF529 | 0.540988285 | 5.34E-42 |
| AC026355.1 | ZNF543 | 0.522156067 | 9.41E-39 |
| AC026355.1 | ZNF546 | 0.736596001 | 1.40E-92 |
| AC026355.1 | ZNF551 | 0.542144266 | 3.33E-42 |
| AC026355.1 | ZNF562 | 0.600348981 | 1.07E-53 |
| AC026355.1 | ZNF571 | 0.58176872 | 8.94E-50 |
| AC026355.1 | ZNF573 | 0.630419515 | 1.29E-60 |
| AC026355.1 | ZNF586 | 0.654447666 | 1.01E-66 |
| AC026355.1 | ZNF587 | 0.551429521 | 6.89E-44 |
| AC026355.1 | ZNF587B | 0.702835867 | 7.11E-81 |
| AC026355.1 | ZNF611 | 0.612478487 | 2.13E-56 |
| AC026355.1 | ZNF619 | 0.511989078 | 4.40E-37 |
| AC026355.1 | ZNF638 | 0.643165522 | 8.72E-64 |
| AC026355.1 | ZNF644 | 0.61217246 | 2.50E-56 |
| AC026355.1 | ZNF652 | 0.596071213 | 9.02E-53 |
| AC026355.1 | ZNF654 | 0.643340294 | 7.87E-64 |
| AC026355.1 | ZNF655 | 0.56392483 | 3.07E-46 |
| AC026355.1 | ZNF66 | 0.614794034 | 6.29E-57 |
| AC026355.1 | ZNF678 | 0.752558283 | 9.13E-99 |
| AC026355.1 | ZNF680 | 0.58601344 | 1.20E-50 |
| AC026355.1 | ZNF700 | 0.56795827 | 5.09E-47 |
| AC026355.1 | ZNF708 | 0.601758113 | 5.27E-54 |
| AC026355.1 | ZNF717 | 0.689239294 | 1.29E-76 |
| AC026355.1 | ZNF718 | 0.632879517 | 3.23E-61 |
| AC026355.1 | ZNF720 | 0.718741455 | 3.56E-86 |
| AC026355.1 | ZNF721 | 0.668799224 | 1.22E-70 |
| AC026355.1 | ZNF736 | 0.631064686 | 8.97E-61 |
| AC026355.1 | ZNF772 | 0.505954044 | 4.05E-36 |
| AC026355.1 | ZNF780A | 0.669370344 | 8.44E-71 |
| AC026355.1 | ZNF780B | 0.692070857 | 1.75E-77 |
| AC026355.1 | ZNF782 | 0.675659506 | 1.36E-72 |
| AL606489.1 | ZNF782 | 0.524929957 | 3.22E-39 |
| AC026355.1 | ZNF789 | 0.572268274 | 7.26E-48 |
| AC026355.1 | ZNF790 | 0.654540396 | 9.59E-67 |
| AC026355.1 | ZNF791 | 0.515951318 | 9.98E-38 |
| AC026355.1 | ZNF800 | 0.70154605 | 1.85E-80 |
| AC026355.1 | ZNF805 | 0.590643592 | 1.29E-51 |
| AC026355.1 | ZNF808 | 0.660244647 | 2.81E-68 |
| AC026355.1 | ZNF81 | 0.649137017 | 2.53E-65 |
| AL606489.1 | ZNF81 | 0.512153895 | 4.13E-37 |
| AC026355.1 | ZNF814 | 0.73845999 | 2.80E-93 |
| AC026355.1 | ZNF83 | 0.525252491 | 2.84E-39 |
| AC026355.1 | ZNF84 | 0.552164491 | 5.04E-44 |
| AC026355.1 | ZNF841 | 0.546421395 | 5.66E-43 |
| AL606489.1 | ZNF841 | 0.508647164 | 1.51E-36 |
| AC026355.1 | ZNF852 | 0.682509139 | 1.36E-74 |
| AC026355.1 | ZNF91 | 0.713173315 | 2.81E-84 |
| AC026355.1 | ZNRF2 | 0.512533154 | 3.59E-37 |
| AC026355.1 | ZRANB2 | 0.540726461 | 5.95E-42 |
| AC026355.1 | ZSWIM6 | 0.550112696 | 1.20E-43 |
| AC026355.1 | ZYG11B | 0.609304557 | 1.11E-55 |

Abbreviations: cor, correlation coefficient
